# Supplementary material
Source: HighWire-hosted journal article supplement (https://heart.bmj.com/content/heartjnl-2015-309223)

## Supplementary Appendix

### **Phosphodiesterase type-5 inhibitor use in type 2 diabetes is associated with a reduction in all cause mortality**

**Running title:** *Phosphodiesterase type-5 inhibitor use in diabetes and mortality*

Simon G Anderson<sup>1, 2†</sup>, *NIHR Clinical Lecturer in Cardiology*  
David C Hutchings<sup>1†</sup>, *BHF Clinical Research Training Fellow and Cardiology SpR*  
Mark Woodward<sup>2,3</sup>, *Professor of Statistics and Epidemiology*  
Kazem Rahimi<sup>2</sup>, *Professor and James Martin Senior Fellow in Essential Healthcare*  
Martin K Rutter<sup>4,5</sup>, *Consultant in Endocrinology*  
Mike Kirby<sup>6</sup>, *Professor of Primary Care Medicine*  
Geoff Hackett<sup>7</sup>, *Professor of Men's Health and Consultant in Urology*  
Andrew W Trafford<sup>1</sup>, *Professor of Cardiac Pathophysiology*  
Adrian H Heald<sup>8,9</sup>, *Consultant in Endocrinology and Research Fellow, Manchester University*

†Joint first authorship

<sup>1</sup>Institute of Cardiovascular Sciences, University of Manchester;

<sup>2</sup>The George Institute for Global Health, Oxford Martin School, University of Oxford, 34 Broad Street, Oxford OX1 3BD, United Kingdom;

<sup>3</sup>The George Institute for Global Health, University of Sydney, Australia;

<sup>4</sup>Manchester Diabetes Centre, Manchester, Central Manchester University Hospitals NHS Foundation Trust, UK

<sup>5</sup>Centre for Endocrinology and Diabetes, Institute of Human Development, University of Manchester, UK

<sup>6</sup>The Centre for Research in Primary & Community Care, University of Hertfordshire;

<sup>7</sup>Department of Urology, Good Hope Hospital, Sutton Coldfield;

<sup>8</sup>School of Medicine, and Manchester Academic Health Sciences Centre, University of Manchester;

<sup>9</sup>Leighton Hospital, Crewe, United Kingdom

**Supplement Table 1.** The anthropometric and clinical characteristics from Imputed and Propensity analyses.

|                                             | Imputed                |                      | Propensity Matched     |                    |
|---------------------------------------------|------------------------|----------------------|------------------------|--------------------|
|                                             | Not prescribed a PDE5i | Prescribed a PDE5i   | Not prescribed a PDE5i | Prescribed a PDE5i |
| N (%)                                       | 4,597 (77.2)           | 1,359 (22.8)         | 513 (82.6)             | 108 (17.4)         |
| Median number of prescriptions <sup>a</sup> |                        | 16 (2-173)           |                        | 17 (7-56)          |
| Age (years)                                 | 72.8 (72.4 - 73.1)     | 71.2 (70.7 - 71.6)** | 74.3 (73.4 – 75.1)     | 72.8 (71.3 – 74.4) |
| HbA1c (%)                                   | 7.3 (7.2 - 7.3)        | 7.4 (7.3 - 7.5)*     | 7.3 (7.2 - 7.4)        | 7.5 (7.2 - 7.8)    |
| BMI kg/m <sup>2</sup>                       | 30.3 (30.1 - 30.5)     | 30.6 (30.2 - 30.9)   | 30.2 (29.6 - 30.8)     | 30.9 (29.7 – 32.1) |
| LDL (mmol/l)                                | 2.17 (2.14 - 2.19)     | 2.20 (2.15 - 2.24)   | 2.12 (2.05 – 2.19)     | 2.21 (2.07 – 2.35) |
| HDL (mmol/l)                                | 1.15 (1.13 – 1.16)     | 1.15 (1.13 – 1.17)   | 1.11 (1.08 – 1.14)     | 1.13 (1.07 – 1.19) |
| Cholesterol (mmol/l)                        | 4.08 (4.05 - 4.11)     | 4.10 (4.05 - 4.17)   | 4.02 (3.94 – 4.10)     | 4.08 (3.91 – 4.24) |
| Albumin g/L                                 | 41.6 (41.5 - 41.7)     | 41.5 (41.3 - 41.7)   | 41.3 (41.0 – 41.6)     | 41.2 (40.5 – 41.8) |
| Creatinine micromole/L                      | 104 (102 - 105)        | 100 (98 - 102)*      | 111 (107 – 114)        | 102 (98 – 107)     |
| eGFR (MDRD)                                 | 68 (67 - 69)           | 70 (69 - 71)**       | 64 (62 – 65)           | 68 (65 - 77)*      |
| Systolic BP (mmHg)                          | 138 (137 - 138)        | 138 (137 - 139)      | 136 (135 – 138)        | 138 (135 – 141)    |
| Diastolic BP (mmHg)                         | 77 (76 - 77)           | 77 (76 - 77)         | 74 (73 - 75)           | 76 (75 – 78)*      |
| Smoking status                              |                        |                      |                        |                    |
| Never smoked                                | 1,375 (30.0)           | 418 (30.7)           | 98 (19.1)              | 32 (29.6)          |
| Ex-smoker                                   | 2,109 (45.9)           | 637 (46.9)           | 263 (51.3)             | 53 (49.1)          |
| Current smoker                              | 1,113 (24.2)           | 304 (22.4)           | 152 (29.6)             | 23 (21.3)          |
| Any statin use                              | 2,997(65.2)            | 1,092 (80.4)**       | 427 (83.2)             | 95 (87.9)          |
| Clopidogrel use                             | 237 (5.2)              | 55 (4.0)             | 53 (10.3)              | 14 (13.0)          |
| Aspirin use                                 | 1,894 (41.2)           | 714 (52.5)**         | 360 (70.2)             | 71 (65.7)          |
| Metformin use                               | 2,126 (46.2)           | 874 (64.3)**         | 278 (54.2)             | 77 (71.3)**        |

|                             |              |              |            |           |
|-----------------------------|--------------|--------------|------------|-----------|
| Beta-blocker use            | 1,303 (28.3) | 338 (24.9)*  | 263 (51.3) | 47 (43.5) |
| History of prior MI         | 840 (18.3)   | 191 (14.0)** | 276 (53.8) | 52 (48.1) |
| Known Atrial Fibrillation   | 680 (14.8)   | 165 (12.1)*  | 115 (22.4) | 19 (17.6) |
| Known Hypertension          | 3,062 (66.6) | 963 (70.8)** | 355 (69.2) | 83 (76.9) |
| Peripheral vascular disease | 518 (11.3)   | 145 (10.7)   | 93 (18.1)  | 20 (18.5) |
| Stroke                      | 367 (8.0)    | 68 (5.0)**   | 48 (9.4)   | 7 (6.5)   |
| TIA                         | 325 (7.1)    | 78 (5.7)     | 61 (11.9)  | 12 (11.1) |
| Congestive Cardiac Failure  | 511 (11.1)   | 108 (8.0)**  | 160 (31.2) | 24 (22.2) |

Data imputed from most recent measure within 1 year of study entry; \*\*P<0.001; \*P<0.05. <sup>a</sup>Median and interquartile range

## Supplementary Figure Legend

- Supplement Figure 1. Forest plot of multivariable adjusted hazard ratios of death associated with PDE5i use from a competing risk regression model.

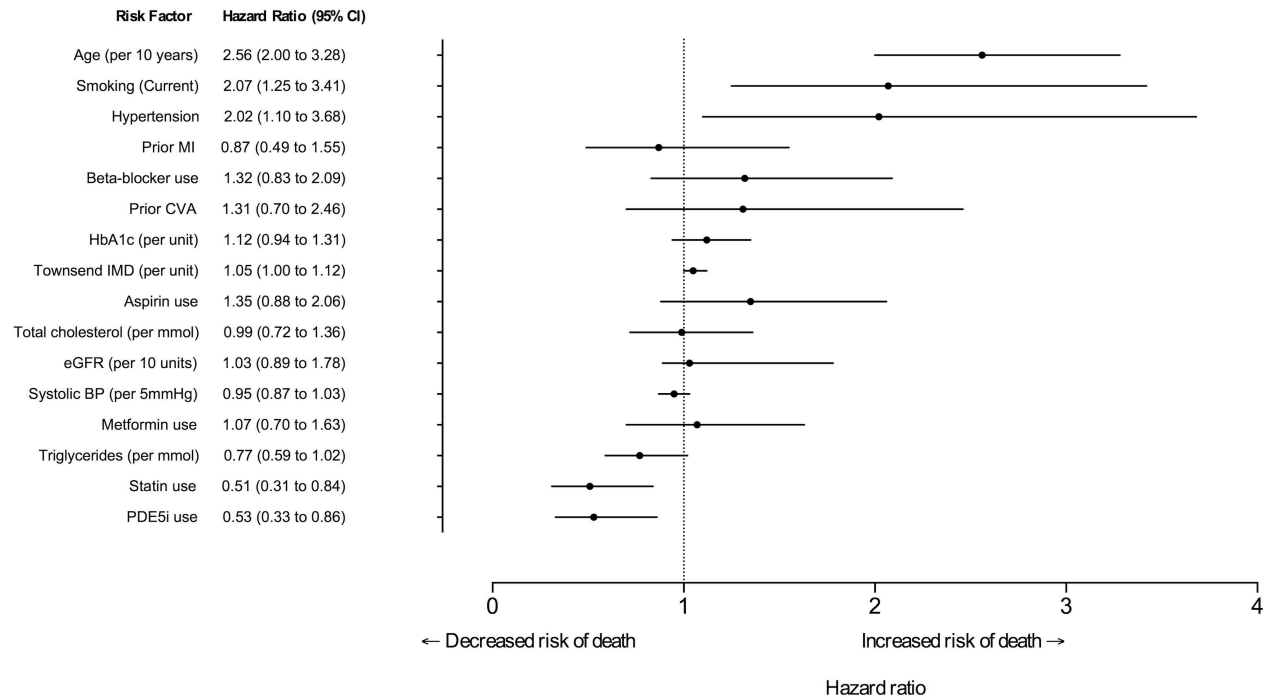

Supplement: inline-supplementary-material-1 [file inline-supplementary-material-1.pdf]
